# Supplementary material for: Fabricating 3D ultra-thin N-doped porous graphene-like catalysts based on polymerized amino acid metal chelates as an efficient oxygen electrocatalyst for Zn-air batteries
Source: Royal Society of Chemistry journal article supplement (doi:10.1039/d2nj02623f), 2022-01-01
Supplement: d2nj02623f1.pdf [file d2nj02623f1.pdf]

# **Fabricating 3D Ultra-thin N-doped Porous Graphene-like Catalysts Based on Polymerized Amino Acid Metal Chelates as Efficient Oxygen Electrocatalyst for Zn–air Batteries**

Yunxiao Zhang<sup>1,a,b</sup>, Wenhua Xiao<sup>1,a</sup>, Yuan Yin<sup>a</sup>, De Zheng Peng<sup>a</sup>, Hongqiang Wang<sup>b</sup>,  
Minjie Zhou<sup>a</sup>, Zhaohui Hou<sup>a</sup>, Yu Liu<sup>a\*</sup>, Binhong He<sup>a\*</sup>

*<sup>a</sup>Key Laboratory of Hunan Province for Advanced Carbon-based Functional Materials, School of Chemistry and Chemical Engineering, Hunan Institute of Science and Technology, Yueyang 414006, Hunan, China*

*<sup>b</sup>Guangxi Key Laboratory of Low Carbon Energy Material, Guangxi Normal University, Guilin 541004, China*

**\*Corresponding authors.**

*Email addresses: hiliu2000@126.com (Y. Liu), 11990398@hnist.edu.cn (B. He)*

<sup>1</sup> These authors contributed equally to this work.

## **Table of Contents**

### **1.1 Materials characterization**

### **1.2 Electrochemical measurements**

#### **1.2.1 ORR performance**

#### **1.2.2 Zn-air batteries performance**

**Figure S1** SEM images of (a,b) NPC-950 and (c,d) NPC-1150.

**Figure S2** SEM image of NPC-1050 (a) and the corresponding elemental mapping images of (b) carbon, (c) nitrogen and (d) oxygen.

**Figure S3** The EDS spectra of NPC-1050 catalyst.

**Figure S4** (a) XPS full scan, (b) N 1s XPS spectrum, (c) C 1s XPS spectrum and (d) O 1s XPS spectrum of NPC-950.

**Figure S5** (a) XPS full scan, (b) N 1s XPS spectrum, (c) C 1s XPS spectrum and (d) O 1s XPS spectrum of NPC-1150.

**Figure S6** LSV curves at different rotating speeds for (a) NC-950, (b) NC-1050, (c) NC-1150 in O<sub>2</sub>-saturated 0.1 M KOH electrolyte (scan rate: 10 mV s<sup>-1</sup>). K-L plots at various potential for (d) NPC-950, (e) NPC-1050, (f) NPC-1150, in O<sub>2</sub>-saturated 0.1 M KOH electrolyte.

**Figure S7**  $J_k$  at 0.85 V of NPCs at different pyrolysis temperatures.

**Figure S8** The number of transferred electrons of NPCs.

**FigureS9** (a)The relative current density vs. time plot on NPC-1050 and commercialized Pt/C electrodes at 0.72 V for 30000 s in O<sub>2</sub> saturated 0.1 M KOH electrolyte. (b) The relative current density vs. time plots on NPC-1050 and

commercialized Pt/C electrodes at 0.72V in O<sub>2</sub> saturated 0.1 M KOH electrolyte before and after adding 3 M methanol.

**Table S1** The XPS result of NPCs.

**Table S2** The N 1s spectra fitting results of NPCs.

**Table S3** The specific BET result of NPCs.

**Table S4** Comparison of the ORR performance in 0.1M KOH solution between this work and some other works reported previously.

## **1.1 Materials characterization**

Scanning electron microscope (SEM) was conducted with a field emission scanning electron microanalyzer (Hitachi S-4800, Japan). Transmission electron microscope (TEM) images were collected on a JEM-2100F with an EDX analytical system. Fourier transform infrared spectroscopy (FTIR) analysis was carried out on a Fourier transform infrared spectrometer (FTIR-5300). X-ray diffraction (XRD) patterns were recorded on a Philips PC-APD diffractometer operating at 40 kV and 60 mA using Cu K $\alpha$  radiation ( $\lambda = 1.5418 \text{ \AA}$ ). Raman spectroscopy was performed on a Labram-010 spectrometer ranging from 500 to 2000 cm<sup>-1</sup>. Electrical conductivity was measured on a SZT-2 four-probe conductivity meter. X-ray photoelectron spectroscopy (XPS) analysis was carried out on an ESCALAB 250 spectrometer using a Mg K $\alpha$  X-ray source.

## **1.2 Electrochemical measurements**

### **1.2.1 ORR performance**

4 mg of the NPCs or Pt/C catalyst (De Nora Elettrodi Co. Ltd., 20 wt.% Pt on

carbon black) was dispersed into the mixture of 980  $\mu\text{L}$  of ethanol and 20  $\mu\text{L}$  of 5 wt.% Nafion solution, and then ultrasonicated for 20 min to form homogeneous catalyst inks. Next, 20  $\mu\text{L}$  of the catalyst ink was carefully dropped onto the polished glassy carbon rotating disk electrode. The electrochemical performance was tested in a typical three-electrode cell on the CHI 760E electrochemical workstation equipped with rotating disk electrode (RDE,  $\Phi = 5$  mm). The geometrical surface area of the disc electrode is 0.196  $\text{cm}^2$  and the catalyst loading is 0.4  $\text{mg cm}^{-2}$ . A platinum foil and an Ag/AgCl electrode filled with saturated KCl aqueous solution were utilized as the counter and reference electrodes, respectively. The ORR activity was detected in  $\text{O}_2$ -saturated 0.1 M KOH solution by using a rotating disk electrode (Pine Instrument, MSR analytical rotator). The ORR kinetic parameters were analyzed by the following KoutechyLevich (K-L) equation:

$$\frac{1}{J} = \frac{1}{0.62nFC_0D_0^{2/3}\nu^{-1/6}\omega^{1/2}} + \frac{1}{J_k}$$

Where  $J$  is the tested current density,  $J_k$  means kinetic current density.  $n$  represents the electron transfer number,  $F$  refers to Faraday constant (96485  $\text{C mol}^{-1}$ ),  $C_0$  is oxygen bulk concentration ( $1.2 \times 10^{-3}$  M in 0.1 M KOH),  $D_0$  is the oxygen diffusion coefficient ( $1.9 \times 10^{-5}$   $\text{cm}^2 \text{s}^{-1}$  in 0.1 M KOH),  $\nu$  is electrolyte kinetic viscosity ( $0.01 \text{ cm}^2 \text{s}^{-1}$ ) and  $\omega$  is disk angular velocity.

In basic electrolyte (0.1 M KOH), all potentials can be converted to reversible hydrogen electrode (RHE) by the following equation:  $E_{\text{RHE}} = E_{\text{Ag/AgCl}} + 0.97$  V. Cyclic voltammetry (CV) curve was tested in  $\text{N}_2$  or  $\text{O}_2$  saturated electrolyte within a voltage range from -0.2 to 1.2 V (vs. RHE) at a scan rate of 50  $\text{mV s}^{-1}$ . Linear sweep

voltammetry (LSV) curve was measured at a scan rate of  $10 \text{ mV s}^{-1}$  at various rotation speeds from 400 to 1600 rpm within identical voltage range. The onset potential is determined by making a tangent line to the horizontal line and a tangent line to the descending slope, intersecting at a point at which the corresponding potential is the onset potential.

### **1.2.2 Zn-air batteries performance**

Liquid Zn-air battery (ZAB) tests were conducted in home-made electrochemical cells. The air cathode consists of a hydrophobic carbon paper ( $3 \text{ cm} \times 3 \text{ cm}$ ) with a gas diffusion layer on the air-facing side and a catalyst layer on the water-facing side. The loading amount for NPC-1050 or Pt/C catalyst (20 wt.% Pt on carbon black) is  $0.9 \text{ mg cm}^{-2}$  onto carbon paper warping the current collector (copper-foam). A polished Zn plate ( $3 \text{ cm} \times 8 \text{ cm}$ ) as the anode. The electrolyte used for ZAB is 6 M KOH containing 0.2 M  $\text{Zn}(\text{Ac})_2$ . ZAB were performed with homemade zinc-air battery using CHI 760E electrochemical workstation and LAND.

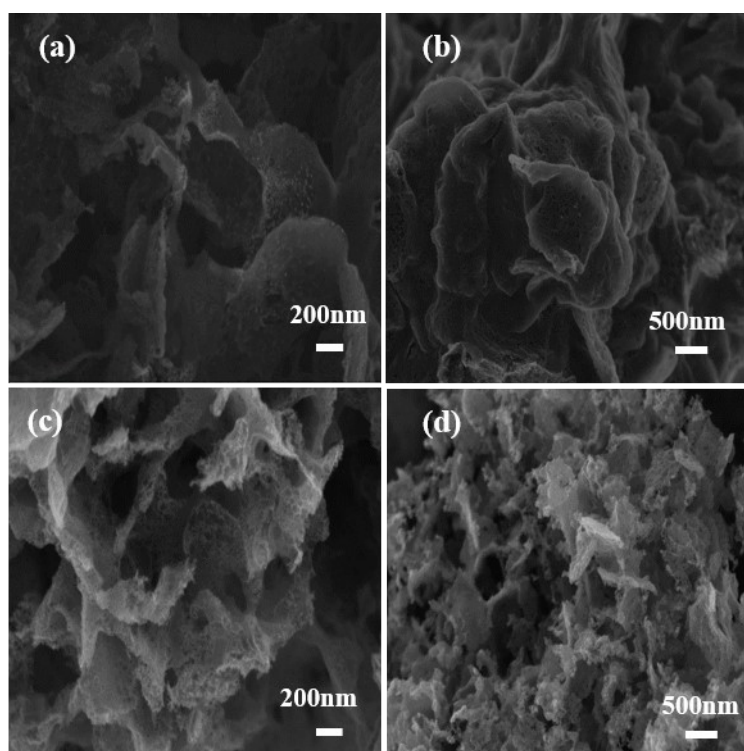

Figure S1 SEM images of (a,b) NPC-950 and (c,d) NPC-1150.

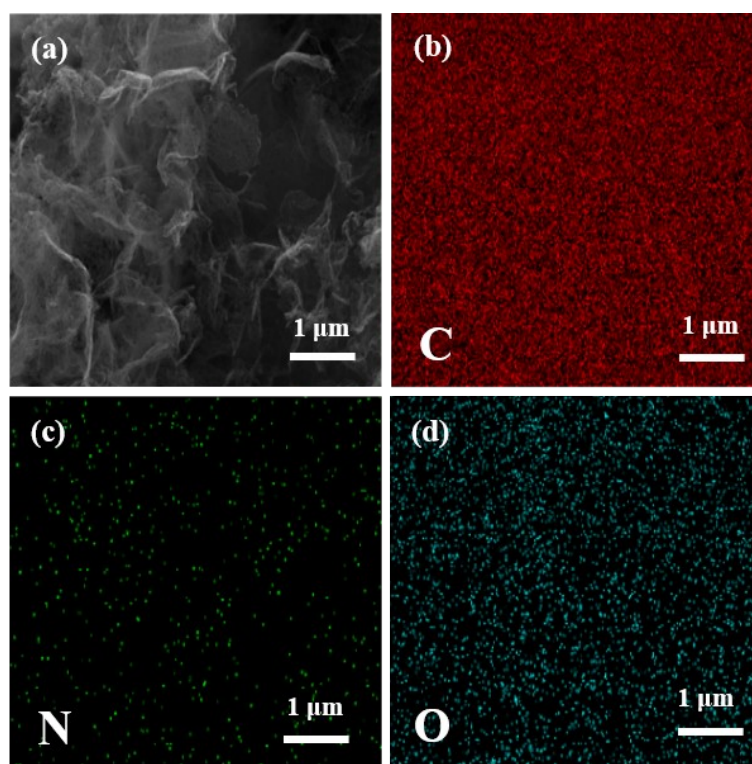

Figure S2 SEM image of (a) NPC-1050 and the corresponding elemental mapping images of (b) carbon, (c) nitrogen and (d) oxygen.

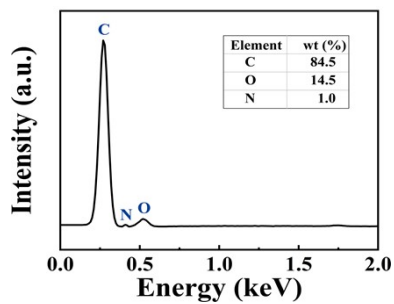

Figure S3 The EDS spectra of NPC-1050 catalyst.

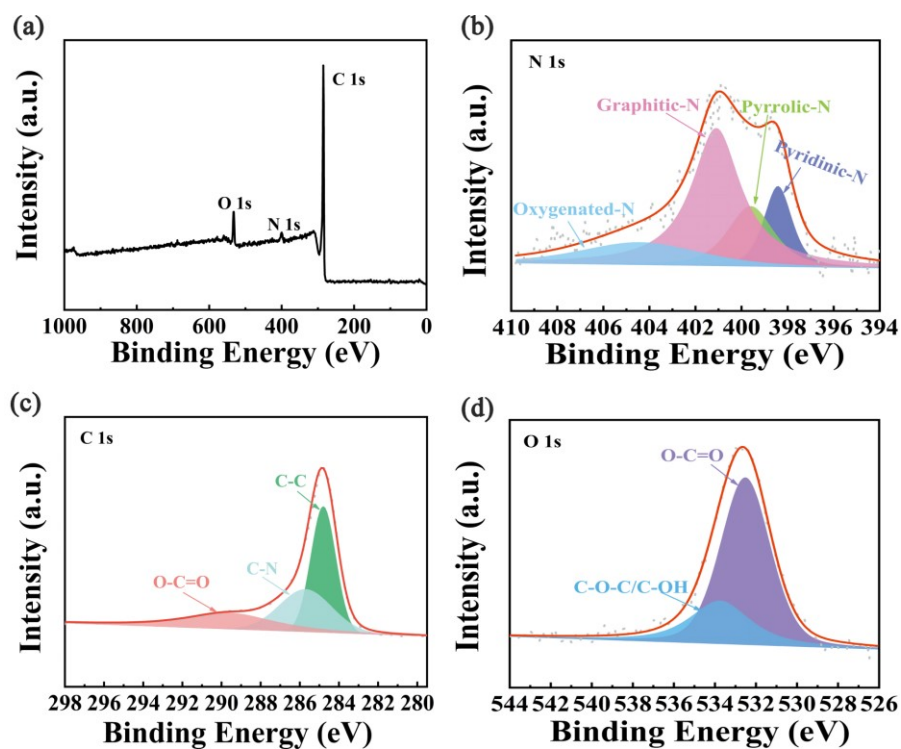

Figure S4 (a) XPS full scan, (b) N 1s XPS spectrum, (c) C 1s XPS spectrum and (d) O 1s XPS spectrum of NPC-950.

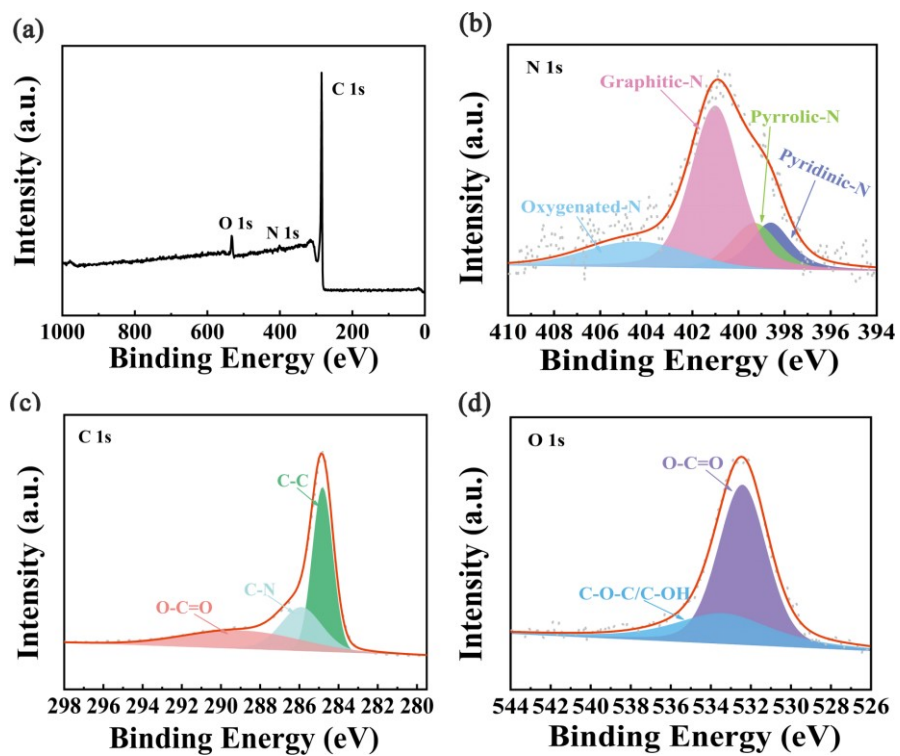

Figure S5 (a) XPS full scan, (b) N 1s XPS spectrum, (c) C 1s XPS spectrum and (d) O 1s XPS spectrum of NPC-1150.



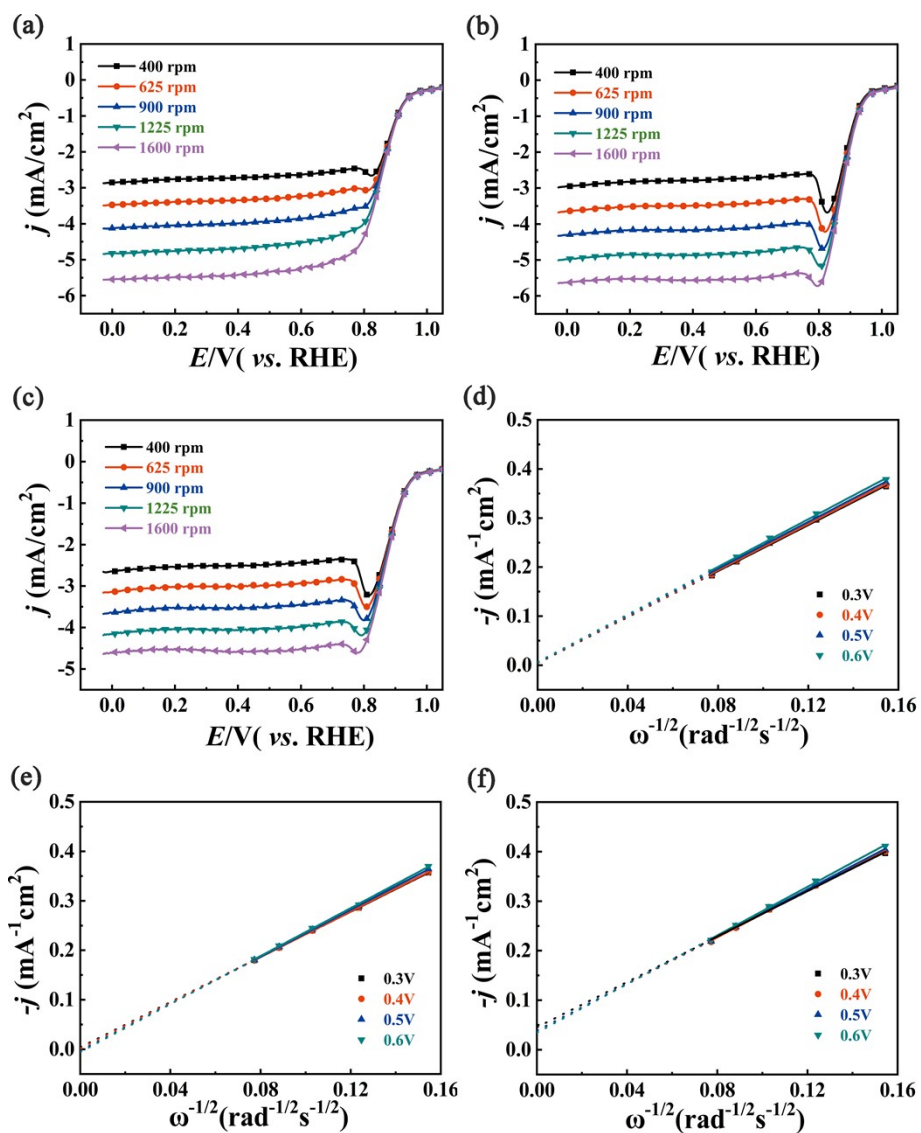

Figure S6 LSV curves at different rotating speeds for (a) NPC-950, (b) NPC-1050, (c) NPC-1150 in O<sub>2</sub>-saturated 0.1 M KOH electrolyte (scan rate: 10 mV s<sup>-1</sup>). K-L plots at various potential for (d) NPC-950, (e) NPC-1050, (f) NPC-1150, in O<sub>2</sub>-saturated 0.1 M KOH electrolyte.

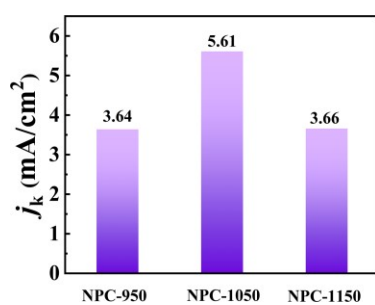

Figure S7  $J_k$  at 0.85 V of NPCs at different pyrolysis temperatures.

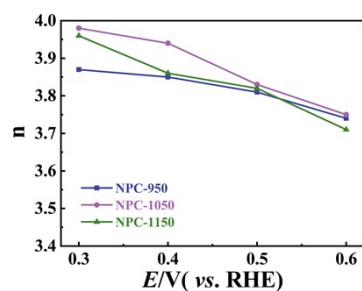

Figure S8 The number of transferred electrons of NPCs.

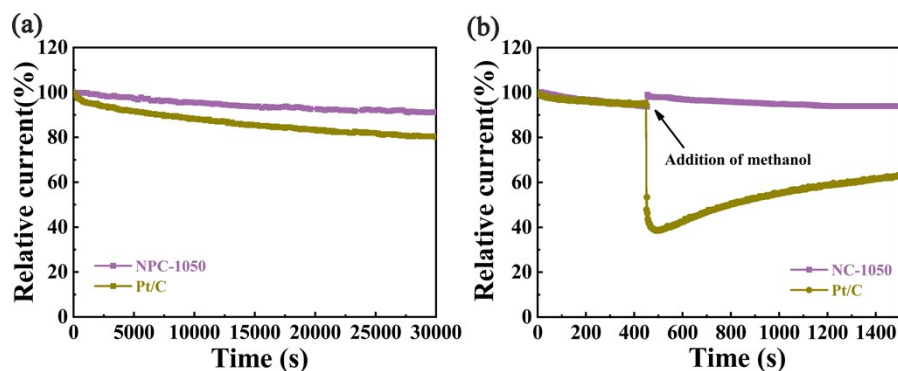

Figure S9 (a) The relative current density vs. time plot on NPC-1050 and commercialized Pt/C electrodes at 0.72 V for 30000 s in O<sub>2</sub> saturated 0.1 M KOH electrolyte. (b) The relative current density vs. time plots on NPC-1050 and commercialized Pt/C electrodes at 0.72V in O<sub>2</sub> saturated 0.1 M KOH electrolyte before and after adding 3 M methanol.

Table S1. The XPS result of NPCs.

| Samples  | C (at. %) | N (at. %) | O (at. %) |
|----------|-----------|-----------|-----------|
| NPC-950  | 88.89     | 3.84      | 7.27      |
| NPC-1050 | 92.62     | 2.63      | 4.74      |
| NPC-1150 | 93.07     | 2.24      | 4.68      |

Table S2. The N 1s spectra fitting results of NPCs.

| Samples  | Pyridinic-N (%) | Pyrrolic-N (%) | Graphitic-N (%) | Oxygenated-N (%) |
|----------|-----------------|----------------|-----------------|------------------|
| NPC-950  | 14.23           | 17.26          | 51.34           | 17.17            |
| NPC-1050 | 17.13           | 15.46          | 53.24           | 14.16            |
| NPC-1150 | 14.72           | 14.65          | 54.52           | 16.11            |

Table S3. The specific BET result of NPCs samples.

| Samples  | Specific Surface Area<br>(m <sup>2</sup> g <sup>-1</sup> ) | Pore Volume<br>(cm <sup>3</sup> g <sup>-1</sup> ) | Pore Size (nm) |
|----------|------------------------------------------------------------|---------------------------------------------------|----------------|
| NPC-950  | 1321.75                                                    | 1.79                                              | 7.01           |
| NPC-1050 | 1501.00                                                    | 1.62                                              | 5.87           |
| NPC-1150 | 1334.35                                                    | 1.80                                              | 7.81           |

Table S4. Comparison of the ORR performance in 0.1M KOH solution between this work and some other works reported previously.

| Samples         | $E_{onset}$<br>(V vs. RHE) | $E_{1/2}$<br>(V vs. RHE) | $J_L$<br>(mA cm <sup>-2</sup> ) | Transfer<br>number<br>(n) | loading<br>mass<br>(mg cm <sup>-2</sup> ) | References       |
|-----------------|----------------------------|--------------------------|---------------------------------|---------------------------|-------------------------------------------|------------------|
| <b>NPC-1050</b> | <b>0.970</b>               | <b>0.878</b>             | <b>5.64</b>                     | <b>3.88</b>               | <b>0.40</b>                               | <b>This work</b> |
| CMP-NP-900      | 0.930                      | 0.857                    | -                               | 3.96                      | 0.31                                      | <b>S1</b>        |
| JCNT-0.5        | 0.97                       | 0.88                     | 5.85                            | 4.0                       | 0.4                                       | <b>S2</b>        |
| PANRGO-700      | -                          | 0.864                    | -                               | 3.96                      | 0.20                                      | <b>S3</b>        |
| NCF             | 1.0                        | 0.85                     | 5.9                             | 3.85                      | 0.20                                      | <b>S4</b>        |
| NPC-1000        | 0.90                       | 0.82                     | -                               | 3.70                      | 0.43                                      | <b>S5</b>        |
| N-CNSP          | 0.96                       | 0.85                     | 6.1                             | 4.00                      | 0.51                                      | <b>S6</b>        |
| NCD 1000        | 0.96                       | 0.86                     | 5.74                            | 3.8                       | 0.25                                      | <b>S7</b>        |
| CF              | 1.02                       | 0.87                     | ~4                              | 3.4~3.8                   | 0.25                                      | <b>S8</b>        |
| HNCSs           | 0.92                       | 0.82                     | 5.34                            | 3.86                      | 0.20                                      | <b>S9</b>        |

## References

- [S1] H. Sun, P. Zhou, X. Ye, J. Wang, Z. Tian, Z. Zhu, C. Ma, W. Liang, A. Li, Nitrogen-doping hollow carbon nanospheres derived from conjugated microporous polymers toward oxygen reduction reaction, *J Colloid Interface Sci* 617 (2022) 11-19.
- [S2] C. Jin, H. Deng, J. Zhang, Y. Hao, J. Liu, Jagged carbon nanotubes from polyaniline: Strain-driven high-performance for Zn-air battery, *Chemical Engineering Journal* 434 (2022).
- [S3] H. Begum, M.S. Ahmed, S. Jung, Template-free synthesis of polyacrylonitrile-derived porous carbon nanoballs on graphene for efficient oxygen reduction in zinc-air batteries, *Journal of Materials Chemistry A* 9(15) (2021) 9644-9654.
- [S4] L. Zhang, T. Gu, K. Lu, L. Zhou, D.S. Li, R. Wang, Engineering Synergistic Edge-N Dipole in Metal-Free Carbon Nanoflakes toward Intensified Oxygen Reduction Electrocatalysis, *AFM* 31(42) (2021).
- [S5] B. Guo, R. Ma, Z. Li, S. Guo, J. Luo, M. Yang, Q. Liu, T. Thomas, J. Wang, Hierarchical N-doped porous carbons for Zn-Air batteries and supercapacitors, *Nano-micro letters* 12(1) (2020) 1-13.
- [S6] L. Zong, W. Wu, S. Liu, H. Yin, Y. Chen, C. Liu, K. Fan, X. Zhao, X. Chen, F. Wang, Y. Yang, L. Wang, S. Feng, Metal-free, active nitrogen-enriched, efficient bifunctional oxygen electrocatalyst for

ultrastable zinc-air batteries, *Energy Storage Materials* 27 (2020) 514-521.

[S7] Q. Lai, J. Zheng, Z. Tang, D. Bi, J. Zhao, Y. Liang, Optimal Configuration of N-Doped Carbon Defects in 2D Turbostratic Carbon Nanomesh for Advanced Oxygen Reduction Electrocatalysis, *Angew Chem Int Ed Engl* 59(29) (2020) 11999-12006.

[S8] J. Gao, Y. Wang, H. Wu, X. Liu, L. Wang, Q. Yu, A. Li, H. Wang, C. Song, Z. Gao, M. Peng, M. Zhang, N. Ma, J. Wang, W. Zhou, G. Wang, Z. Yin, D. Ma, Construction of a sp<sup>3</sup> /sp<sup>2</sup> Carbon Interface in 3D N-Doped Nanocarbons for the Oxygen Reduction Reaction, *Angew Chem Int Ed Engl* 58(42) (2019) 15089-15097.

[S9] L. Chai, L. Zhang, X. Wang, L. Xu, C. Han, T.-T. Li, Y. Hu, J. Qian, S. Huang, Bottom-up synthesis of MOF-derived hollow N-doped carbon materials for enhanced ORR performance, *Carbon* 146 (2019) 248-256.
